# Supplementary material
Source: PubMed Central journal article supplement (PMC10267841)
Supplement: jamadermatol-e231574-s001.pdf [file jamadermatol-e231574-s001.pdf]

## Supplemental Online Content

Pandeya N, Isbel N, Campbell S, et al. High-risk prognostic tumor features of squamous cell carcinomas in organ transplant recipients compared with the general population. *JAMA Dermatol*. Published online June 14, 2023. doi:10.1001/jamadermatol.2023.1574

**eTable 1.** Demographic and tumor characteristics for SCC tumors in organ transplant recipients and general population cohorts stratified by site

**eTable 2.** Characteristics of SCC tumors by transplant type

This supplemental material has been provided by the authors to give readers additional information about their work.

**eTable 1. Demographic and tumor characteristics for SCC tumors in organ transplant recipients and general population cohorts stratified by site**

|                            | Organ transplant     |                       |                                | General population   |                       |                                |
|----------------------------|----------------------|-----------------------|--------------------------------|----------------------|-----------------------|--------------------------------|
|                            | Head/neck<br>(n=285) | Arms/hands<br>(n=240) | Trunk/lower<br>limb<br>(n=213) | Head/neck<br>(n=812) | Arms/hands<br>(n=896) | Trunk/lower<br>limb<br>(n=839) |
| <b>Age at diagnosis</b>    |                      |                       |                                |                      |                       |                                |
| <50                        | 15 (5.3)             | 11 (4.6)              | 10 (4.7)                       | 47 (5.8)             | 53 (5.9)              | 25 (3.0)                       |
| 50-59                      | 76 (26.7)            | 59 (24.6)             | 53 (24.9)                      | 197 (24.3)           | 221 (24.7)            | 201 (24.0)                     |
| 60-69                      | 157 (55.1)           | 142 (59.2)            | 121 (56.8)                     | 475 (58.5)           | 520 (58.0)            | 488 (58.2)                     |
| 70 or more                 | 37 (13.0)            | 28 (11.7)             | 29 (13.6)                      | 93 (11.5)            | 102 (11.4)            | 125 (14.9)                     |
| <b>Sex</b>                 |                      |                       |                                |                      |                       |                                |
| Female                     | 27 (9.5)             | 42 (17.5)             | 51 (23.9)                      | 165 (20.3)           | 356 (39.7)            | 323 (38.4)                     |
| Male                       | 258 (90.5)           | 198 (82.5)            | 162 (76.1)                     | 647 (79.7)           | 540 (60.3)            | 516 (61.5)                     |
| <b>Perineural invasion</b> |                      |                       |                                |                      |                       |                                |
| No                         | 197 (92.9)           | 182 (99.5)            | 161 (99.4)                     | 562 (98.4)           | 612 (99.8)            | 616 (99.0)                     |
| Yes                        | 15 (7.1)             | 1 (0.6)               | 1 (0.6)                        | 9 (1.6)              | 1 (0.2)               | 6 (1.0)                        |
| <b>Tumor invasion</b>      |                      |                       |                                |                      |                       |                                |
| Dermis                     | 168 (76.7)           | 176 (97.8)            | 154 (95.7)                     | 698 (92.6)           | 799 (98.8)            | 748 (99.1)                     |
| To/beyond fat              | 51 (23.3)            | 4 (2.2)               | 7 (4.4)                        | 56 (7.4)             | 10 (1.2)              | 7 (0.9)                        |
| <b>Tumor grade</b>         |                      |                       |                                |                      |                       |                                |
| Poorly-differentiated      | 41 (15.1)            | 19 (8.4)              | 13 (6.3)                       | 35 (4.5)             | 9 (1.0)               | 12 (1.5)                       |
| Moderately-differentiated  | 155 (57.0)           | 111 (49.3)            | 75 (36.2)                      | 372 (47.6)           | 235 (27.3)            | 164 (20.6)                     |

|                     | Organ transplant     |                       |                                | General population   |                       |                                |
|---------------------|----------------------|-----------------------|--------------------------------|----------------------|-----------------------|--------------------------------|
|                     | Head/neck<br>(n=285) | Arms/hands<br>(n=240) | Trunk/lower<br>limb<br>(n=213) | Head/neck<br>(n=812) | Arms/hands<br>(n=896) | Trunk/lower<br>limb<br>(n=839) |
| Well-differentiated | 76 (27.9)            | 95 (42.2)             | 119 (57.5)                     | 374 (47.9)           | 616 (71.6)            | 618 (77.8)                     |
| <b>Tumor size</b>   |                      |                       |                                |                      |                       |                                |
| ≤20mm               | 245 (95.3)           | 216 (94.7)            | 190 (95.5)                     | 746 (96.8)           | 853 (98.6)            | 794 (96.8)                     |
| >20mm               | 12 (4.7)             | 12 (5.3)              | 9 (4.5)                        | 25 (3.2)             | 12 (1.4)              | 26 (3.2)                       |

**eTable 2. Characteristics of SCC tumors by transplant type**

|                                | Kidney (n=458) | Lung (n=88) | Liver (n=195) |         |
|--------------------------------|----------------|-------------|---------------|---------|
|                                | Count (%)      | Count (%)   | Count (%)     | P value |
| <b>Body site</b>               |                |             |               |         |
| Head/neck                      | 167 (36.6)     | 55 (62.5)   | 63 (32.5)     |         |
| Scalp                          | 22 (13.2)      | 10 (18.2)   | 16 (25.4)     |         |
| Ear                            | 26 (15.6)      | 4 (7.3)     | 5 (7.9)       |         |
| Face                           | 97 (58.1)      | 25 (45.5)   | 26 (41.3)     |         |
| Lip                            | 6 (3.6)        | 6 (10.9)    | 7 (11.1)      |         |
| Neck                           | 16 (9.6)       | 10 (18.2)   | 9 (14.3)      |         |
| Trunk                          | 49 (10.8)      | 7 (8.0)     | 22 (11.3)     |         |
| Arms/hands                     | 156 (34.2)     | 19 (21.6)   | 65 (33.5)     |         |
| Legs/feet                      | 84 (18.4)      | 7 (8.0)     | 44 (22.7)     | <0.001  |
| <i>Missing</i>                 | 2              | -           | 1             |         |
| <b>Perineural invasion</b>     |                |             |               |         |
| No                             | 332 (96.8)     | 70 (94.6)   | 140 (98.6)    |         |
| Yes                            | 11 (3.2)       | 4 (5.4)     | 2 (1.4)       | 0.26    |
| <i>Missing</i>                 | 115            | 14          | 53            |         |
| <b>Level of tumor invasion</b> |                |             |               |         |
| Dermis                         | 281 (88.6)     | 64 (82.1)   | 154 (92.8)    |         |
| To/beyond subcutaneous fat     | 36 (11.4)      | 14 (18.0)   | 12 (7.2)      | 0.04    |

|                           | <b>Kidney (n=458)</b> | <b>Lung (n=88)</b> | <b>Liver (n=195)</b> |                |
|---------------------------|-----------------------|--------------------|----------------------|----------------|
|                           | <b>Count (%)</b>      | <b>Count (%)</b>   | <b>Count (%)</b>     | <b>P value</b> |
| <i>Missing</i>            | 141                   | 10                 | 29                   |                |
| <b>Tumor grade</b>        |                       |                    |                      |                |
| Poorly differentiated     | 49 (11.4)             | 18 (20.4)          | 6 (3.2)              |                |
| Moderately differentiated | 225 (52.3)            | 41 (46.6)          | 77 (40.7)            |                |
| Well differentiated       | 156 (36.3)            | 29 (33.0)          | 106 (56.1)           | <0.001         |
| <i>Missing</i>            | 28                    | -                  | 6                    |                |
| <b>Tumor size</b>         |                       |                    |                      |                |
| ≤20mm                     | 397 (93.4)            | 78 (95.1)          | 179 (99.4)           |                |
| >20mm                     | 28 (6.6)              | 4 (4.9)            | 1 (0.6)              | 0.007          |
| <i>Missing</i>            | 33                    | 6                  | 15                   |                |
