# Supplementary material
Source: PubMed Central journal article supplement (PMC10267841)
Supplement: jamadermatol-e231574-s002.pdf [file jamadermatol-e231574-s002.pdf]

## Data Sharing Statement

Pandeya. High-risk Prognostic Tumor Features of Squamous Cell Carcinomas in Organ Transplant Recipients Compared With the General Population. *JAMA Dermatol.* Published June 14, 2023. doi:10.1001/jamadermatol.2023.1574

### Data

**Data available:** Yes

**Data types:** Deidentified participant data, Data dictionary

**How to access data:** Data will be made available upon reasonable request from:

[Nirmala.Pandeya@qimrberghofer.edu.au](mailto:Nirmala.Pandeya@qimrberghofer.edu.au)

**When available:** With publication

### Supporting Documents

**Document types:** None

### Additional Information

**Who can access the data:** n/a

**Types of analyses:** n/a

**Mechanisms of data availability:** n/a
